# Supplementary material for: Fabrication of Cu–Ag bimetal nanotube-based copper silicates for enhancement of antibacterial activities
Source: Royal Society of Chemistry journal article supplement (doi:10.1039/c5ra06065f), 2015-01-01
Supplement: c5ra06065f1.pdf [file c5ra06065f1.pdf]

## Supporting Information

for

# Fabrication of Cu-Ag Bimetal Nanotube- Based Copper Silicates for Enhancement of Antibacterial Activities

*Weijun Fang,<sup>\* a, #</sup> chaofa Xu<sup>b, #</sup> Jun Zheng,<sup>\* , c</sup> Guangjun Chen<sup>a</sup> and Kong Jiang<sup>a</sup>*

<sup>a</sup> College of Basic Medicine, Anhui Medical University, Hefei 230032, P.R. China,

<sup>b</sup> State Key Laboratory of Physical Chemistry of Solid Surfaces, Xiamen University,  
Xiamen 361005, P.R. China

<sup>c</sup> Center of Modern Experimental Technology, Anhui University, Hefei 230039,  
Anhui, China

### **Corresponding Author**

\* E-mail: wjfang81@163.com (Weijun Fang)

\* E-mail: jzheng@ahu.edu.cn (Jun Zheng)

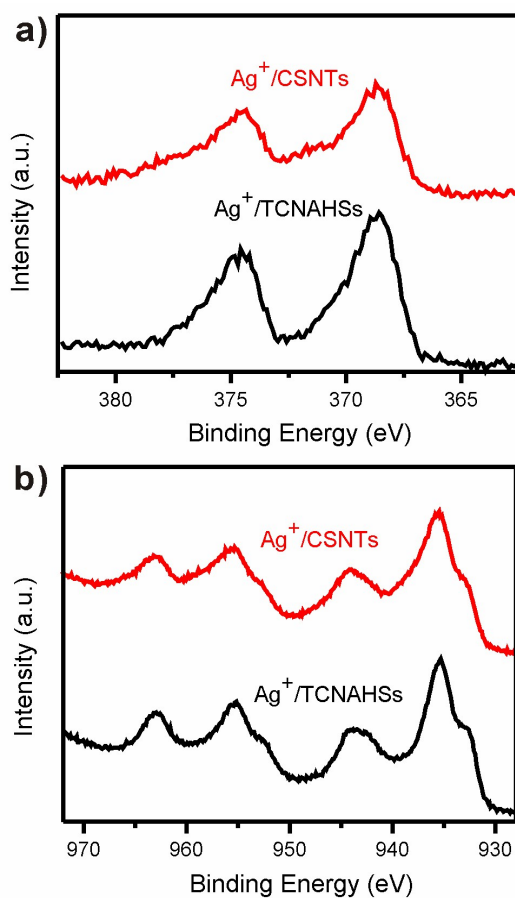

**Figure S1.** XPS spectra of Ag<sup>+</sup>/CSNTs and Ag<sup>+</sup>/CSNAHSs: (a) high-resolution spectra of Ag<sup>3d</sup>, (b) high-resolution spectra of Cu<sup>2p</sup>. The binding energy scale has been adjusted to the C1s line at 284.6 eV.

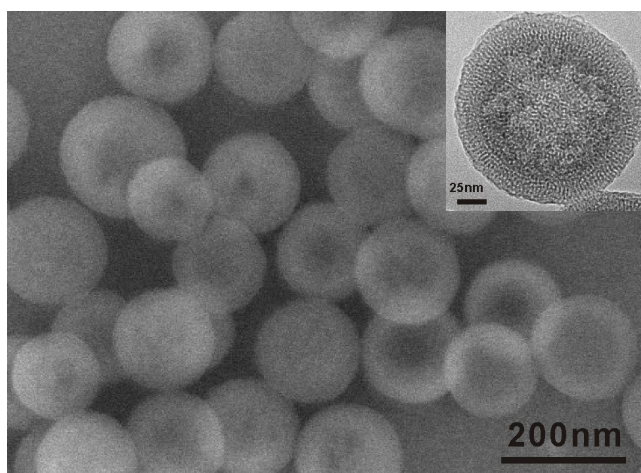

**Figure S2.** SEM images and TEM images (inset) of HMSHs.

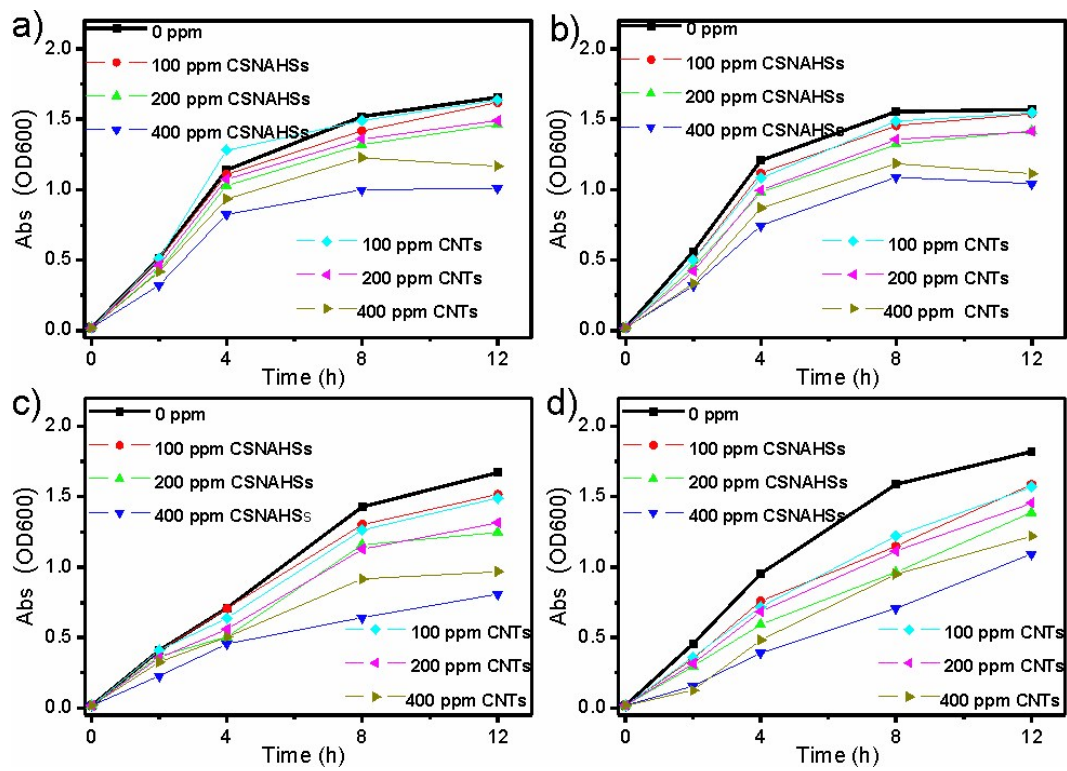

**Figure S3.** Bacterial growth curves in LB liquid medium inoculated with different concentrations of CSNTs or CSNAHSs. Gram-negative bacteria : (a) *E. coli* BL21 and (b) *E. coli* JM109; Gram-positive bacteria: (c) *B. subtilis* and (d) *S. aureus*.
